# Supplementary material for: Dibenzothiophene derivatives as host materials for high efficiency in deep blue phosphorescent organic light emitting diodes
Source: Royal Society of Chemistry journal article supplement (doi:10.1039/c1jm12421h), 2011-01-01
Supplement: c1jm12421h.pdf [file c1jm12421h.pdf]

**Supporting information**

**Dibenzothiophene Derivatives As Host Materials For High  
Efficiency In Deep Blue Phosphorescent Organic Light Emitting  
Diodes**

Sook Hee Jeong, and Jun Yeob Lee\*

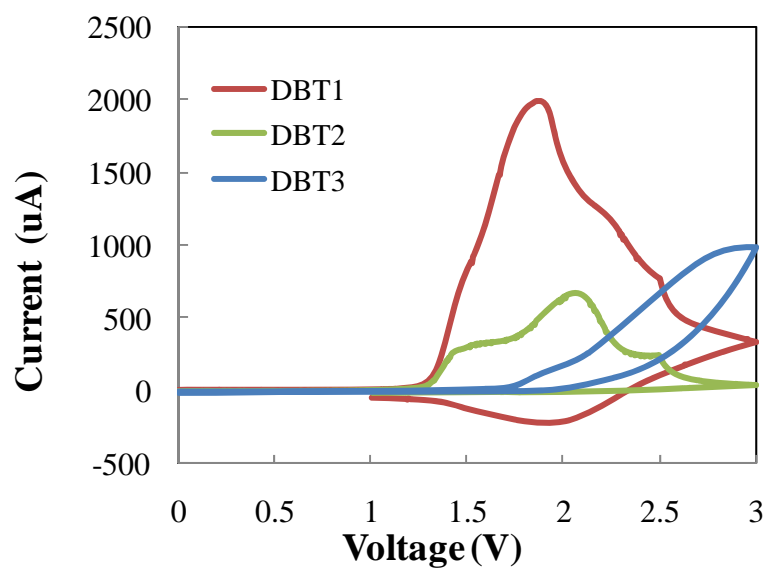

**Figure S1** Cyclic voltammetry curves of DBT1, DBT2 and DBT3.
